# Supplementary material for: Alias Structures and Sequential Experimentation for Mixed-Level Designs
Source: MDPI journal article supplement (doi:10.3390/math9233053), 2021-11-28

## Instruction for use the function Matlab “GENERADORESTRUCTURAALIASITC”.

Step 1. Go <https://www.dropbox.com/sh/jvjvsx3nlye6c3g/AADMwFoVlvcwqjZcUmwFs02a?dl=0> and download the file

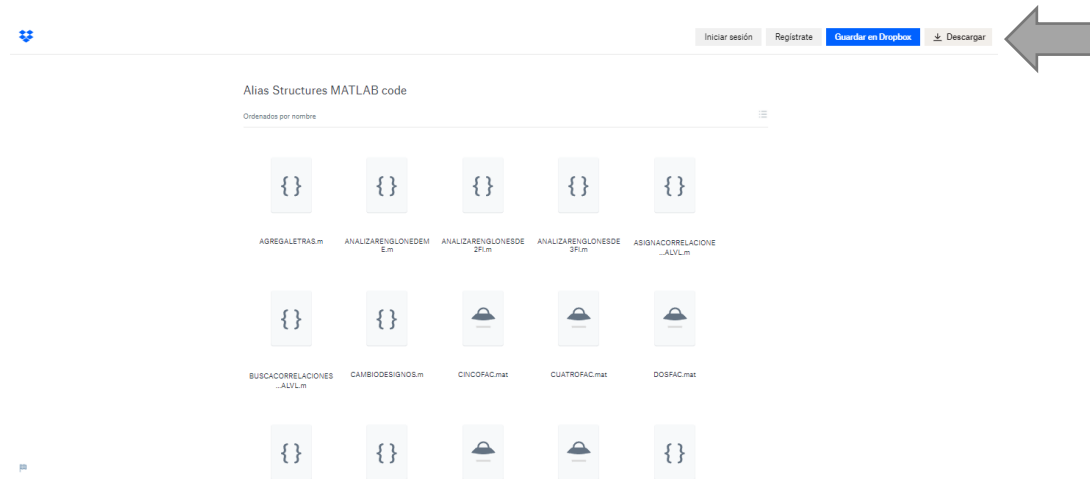

Step 2. Open Matlab and go to the file Alias Structures MATLAB code.

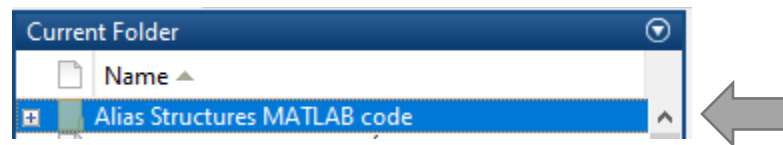

Step 3. Enter the fraction

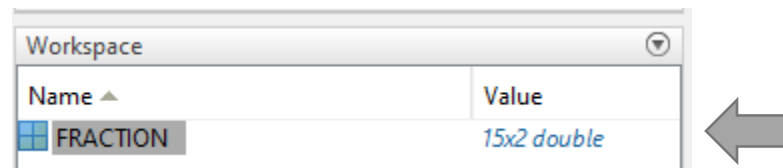

Step 4. Call the function and run

Current Folder

| Name                                  |
|---------------------------------------|
| DOSFAC.mat                            |
| GENERADORESTRUCTURAALIASITC.m         |
| LOCALIZACORRELACIONESSUPERIORESALVL.m |
| NUEVEFAC.mat                          |
| OCHOFAC.mat                           |
| PASO1A3CALCULARCORRELACIONES.m        |
| PASO4.m                               |
| PASO5.m                               |
| RENG2.mat                             |
| RENG3.mat                             |
| RENG4.mat                             |
| RENG5.mat                             |
| RENG6.mat                             |
| RENG7.mat                             |

GENERADORESTRUCTURAALIASITC.m (Function)

Workspace

| Name     | Value       |
|----------|-------------|
| FRACTION | 15x2 double |

Command Window

```
>> GENERADORESTRUCTURAALIASITC(FRACTION)
```



Command Window

```
>> GENERADORESTRUCTURAALIASITC(FRACTION)
ALIAS CALCULADOS CORRECTAMENTE b
=====
EFECTO
'A'

=
+1.000000
'A'

-0.215473
'AB'

=====
EFECTO
'B'

=
+1.000000
'B'
```



Supplement: s1 [file s1]
